# Supplementary material for: Role of Healthcare Professionals and Sociodemographic Characteristics in COVID-19 Vaccination Acceptance among Uro-Oncology Patients: A Cross-Sectional Observational Study
Source: MDPI journal article supplement (doi:10.3390/vaccines11050911), 2023-04-28
Supplement: s1 [file s1]

QUESTIONNAIRE - Attitudes related to vaccination against COVID-19 in uro-oncology patients

| <b>Sociodemographic data</b>                                                                                         |                                                                                                                                                |
|----------------------------------------------------------------------------------------------------------------------|------------------------------------------------------------------------------------------------------------------------------------------------|
| Gender                                                                                                               | 1. Male<br>2. Female                                                                                                                           |
| Date of Birth                                                                                                        | <i>day.month.year</i>                                                                                                                          |
| Permanent residence                                                                                                  | 1. In Capital city<br>2. Outside Capital city                                                                                                  |
| The highest level of education                                                                                       | 1. Elementary school or less<br>2. High School<br>3. Higher education                                                                          |
| Are you a Healthcare Professional?                                                                                   | 1. Yes<br>2. No                                                                                                                                |
| Number of household members                                                                                          | 1. Living alone<br>2. Living with 1 member<br>3. Living with $\geq 2$ members                                                                  |
| Are any of the family members healthcare workers?                                                                    | 1. Yes<br>2. No                                                                                                                                |
| Do you have any other chronic diseases?                                                                              | 1. Yes<br>2. No                                                                                                                                |
| Of the listed, which chronic diseases do you have?<br><i>(there can be more than one answer)</i>                     | 1. Cardiovascular diseases<br>2. Diabetes mellitus<br>3. Obesity<br>4. Chronic obstructive pulmonary disease<br>5. Chronic renal failure       |
| <b>COVID-19 vaccination</b>                                                                                          |                                                                                                                                                |
| Have you been vaccinated against COVID-19?                                                                           | 1. Yes<br>2. No                                                                                                                                |
| Did you have enough vaccination information, given that you are being treated for a malignant disease                | 1. Yes<br>2. No                                                                                                                                |
| Have you consulted a doctor about vaccination?                                                                       | 1. Yes<br>2. No                                                                                                                                |
| Which doctors did you consult with<br><i>(there can be more than one answer)</i>                                     | 1. Chosen Primary care physician<br>2. Urologist<br>3. Medical Oncologist<br>4. Other specialties                                              |
| What did the doctors involved in your treatment advise you, given that you are being treated for a malignant disease | 1. For vaccination<br>2. Against vaccination<br>3. Advise not received<br>4. Indeterminate                                                     |
| Have your household members been vaccinated?                                                                         | 1. Yes<br>2. No                                                                                                                                |
| What mostly influenced your decision to or NOT to vaccinate?<br><i>(there can be more than one answer)</i>           | 1. Doctor's advice<br>2. Public media<br>3. Primary malignant disease<br>4. Family members<br>5. Personal beliefs<br>6. I don't want to answer |
| Have you previously contracted COVID-19 infection and when?                                                          | 1. Yes, before systemic treatment started<br>2. Yes, during systemic treatment<br>3. No                                                        |

QUESTIONNAIRE - Attitudes related to vaccination against COVID-19 in uro-oncology patients

|                                                                                                     |                                                                            |
|-----------------------------------------------------------------------------------------------------|----------------------------------------------------------------------------|
| <i>for those who have been vaccinated</i>                                                           |                                                                            |
| How many doses of vaccine have you received?                                                        | 1. Two doses<br>2. Three doses                                             |
| Dates of all doses<br>1. 1 <sup>st</sup> dose<br>2. 2 <sup>nd</sup> dose<br>3. 3 <sup>rd</sup> dose | <i>day. month.year</i><br><i>day. month.year</i><br><i>day. month.year</i> |
| Have you hesitated to get the vaccine?                                                              | 1. Yes<br>2. No                                                            |
| <i>for those who have not been vaccinated</i>                                                       |                                                                            |
| Would you change your mind and get vaccinated now?                                                  | 1. Yes<br>2. No                                                            |
